# Supplementary material
Source: PubMed Central journal article supplement (PMC7038898)
Supplement: NIHMS1537449-supplement-1.pdf [file NIHMS1537449-supplement-1.pdf]

**Additional Statistical Information:**

| <b>Panel</b>            | <b>Statistical test</b>                                   | <b>P value</b>        | <b>Confidence interval</b>                     |
|-------------------------|-----------------------------------------------------------|-----------------------|------------------------------------------------|
| <b>Fig. 1f</b>          | <i>Two-tailed unpaired Student's t test</i>               | P <0.0001             | 95% confidence interval [-37.14 to -17.81]     |
| <b>Fig. 2i</b>          | <i>One-tailed wilcoxon matched-pairs signed rank test</i> | P = 0.0312            | 96.88 % confidence interval [-134.8 to -69.49] |
| <b>Fig. 2m</b>          | <i>One-tailed wilcoxon matched-pairs signed rank test</i> | P <0.0001             | 97.10% confidence interval [-7.952 to -4.103]  |
| <b>Fig. 3c</b>          | <i>Two-tailed paired Student's t test</i>                 | P <0.0001             | 95% confidence interval [-97.14 to -83.24]     |
| <b>Fig. 3f</b>          | <i>Two-tailed paired Student's t test</i>                 | P <0.0001             | 95% confidence interval [-93.99 to -74.28]     |
| <b>Fig. 3g (top)</b>    | <i>One-tailed wilcoxon matched-pairs signed rank test</i> | P <0.0001             | 98.08% confidence interval [-98.47 to -90.61]  |
| <b>Fig. 3g (bottom)</b> | <i>One-tailed wilcoxon matched-pairs signed rank test</i> | P= 0.0078             | 99.22% confidence interval [-94.07 to -42.14]  |
| <b>Fig. 4b</b>          | <i>Two-tailed unpaired Student's t test</i>               | P = 0.003             | 95% confidence interval [7.004 to 28.29]       |
| <b>Fig. 4c</b>          | <i>Two-tailed unpaired Student's t test</i>               | P = 0.0023            | 95% confidence interval [5.465 to 18.87]       |
| <b>Fig. 4g</b>          | <i>Two-tailed unpaired Student's t test</i>               | P = 0.0002            | 95% confidence interval [-42.40 to -27.79]     |
| <b>Fig. 4j</b>          | <i>Two-sided Mann Whitney test</i>                        | P = 0.0002            | 95.01% confidence interval [12.27 to -7.146]   |
| <b>Fig. 4k</b>          | <i>Two-tailed unpaired Student's t test</i>               | P <0.0001             | 95% confidence interval [-16.53 to -7.385]     |
| <b>Fig. 4l</b>          | <i>Two-tailed Unpaired Student's t test</i>               | P = 0.0082            | 95% confidence interval [-17.81 to -3.142]     |
| <b>Fig. 5b</b>          | <i>ANOVA summary</i>                                      | P = 0.013<br>F = 9.77 |                                                |
| <b>Fig. 5c</b>          | <i>Linear regression with covariate analysis</i>          | P <0.0001             |                                                |
